# Supplementary material
Source: ML conference proceedings conference paper supplement (https://openaccess.thecvf.com/content/CVPR2026/html/Luo_Tavatar_Topology-Aware_Gaussian_CVPR_2026_paper.html)
Supplement: Supplementary file 1 [file Luo_Tavatar_Topology-Aware_Gaussian_CVPR_2026_supplemental.pdf]

# Tavatar: Topology-Aware Gaussian Attribute Derivation for Animatable Human Avatars

## Supplementary Material

### 7. Overview

This supplementary material provides additional implementation details, experimental settings, and comprehensive results that complement our main paper.

---

#### Algorithm 1 Analytical Face Gaussian Derivation

---

**Input:** Posed vertices  $\mathbf{v}_{i,1}^p, \mathbf{v}_{i,2}^p, \mathbf{v}_{i,3}^p \in \mathbb{R}^3$

**Hyperparameters:**  $\beta = 0.5, \epsilon = 10^{-3}$

**Output:**  $\boldsymbol{\mu}_f^i \in \mathbb{R}^3, \mathbf{R}_f^i \in SO(3), \mathbf{s}_f^i \in \mathbb{R}^3$

```

1: // Compute edge lengths
2:  $l_1 \leftarrow \|\mathbf{v}_{i,2}^p - \mathbf{v}_{i,3}^p\|$ 
3:  $l_2 \leftarrow \|\mathbf{v}_{i,3}^p - \mathbf{v}_{i,1}^p\|$ 
4:  $l_3 \leftarrow \|\mathbf{v}_{i,1}^p - \mathbf{v}_{i,2}^p\|$ 
5: // Position: incenter weighted by opposite edges
6:  $\boldsymbol{\mu}_f^i \leftarrow \frac{l_1 \mathbf{v}_{i,1}^p + l_2 \mathbf{v}_{i,2}^p + l_3 \mathbf{v}_{i,3}^p}{l_1 + l_2 + l_3}$ 
7: // Orientation: construct local coordinate frame
8:  $\mathbf{n}_f^i \leftarrow \frac{(\mathbf{v}_{i,2}^p - \mathbf{v}_{i,1}^p) \times (\mathbf{v}_{i,3}^p - \mathbf{v}_{i,1}^p)}{\|(\mathbf{v}_{i,2}^p - \mathbf{v}_{i,1}^p) \times (\mathbf{v}_{i,3}^p - \mathbf{v}_{i,1}^p)\|}$ 
9:  $\mathbf{t}_1^i \leftarrow \frac{\mathbf{v}_{i,2}^p - \mathbf{v}_{i,1}^p}{\|\mathbf{v}_{i,2}^p - \mathbf{v}_{i,1}^p\|}$ 
10:  $\mathbf{t}_2^i \leftarrow \mathbf{n}_f^i \times \mathbf{t}_1^i$ 
11:  $\mathbf{R}_f^i \leftarrow [\mathbf{t}_1^i, \mathbf{t}_2^i, \mathbf{n}_f^i]$ 
12: // Scale: tied to inradius for uniform coverage
13:  $A_i \leftarrow \frac{1}{2} \|(\mathbf{v}_{i,2}^p - \mathbf{v}_{i,1}^p) \times (\mathbf{v}_{i,3}^p - \mathbf{v}_{i,1}^p)\|$ 
14:  $s_i \leftarrow (l_1 + l_2 + l_3)/2$ 
15:  $r_i \leftarrow A_i/s_i$ 
16:  $s_{f,x}^i \leftarrow \beta \cdot r_i, s_{f,y}^i \leftarrow \beta \cdot r_i, s_{f,z}^i \leftarrow \epsilon$ 
17: return  $\boldsymbol{\mu}_f^i, \mathbf{R}_f^i, \mathbf{s}_f^i = (s_{f,x}^i, s_{f,y}^i, s_{f,z}^i)$ 

```

---

### 8. Analytical Gaussian Derivation Details

We provide algorithmic details for analytically deriving Gaussian attributes from mesh geometry (Sec 4.2 of the main paper), where all geometric attributes ( $\boldsymbol{\mu}, \mathbf{R}, \mathbf{s}$ ) are deterministically computed from local mesh topology.

Both algorithms output three geometric attributes for each Gaussian: (1) position  $\boldsymbol{\mu} \in \mathbb{R}^3$ , (2) rotation matrix  $\mathbf{R} \in SO(3)$  encoding orientation via a local orthonormal frame, and (3) scale vector  $\mathbf{s} \in \mathbb{R}^3$  with a small  $z$ -component ( $\epsilon$ ) for surface conformity.

#### 8.1. Face Gaussian Derivation

Algorithm 1 derives Face Gaussian  $\mathcal{G}_f^i$  for each face  $f_i \in \mathcal{F}$  with vertices  $\{\mathbf{v}_{i,1}^p, \mathbf{v}_{i,2}^p, \mathbf{v}_{i,3}^p\}$ . The position  $\boldsymbol{\mu}_f^i$  is placed at the weighted incenter, the rotation  $\mathbf{R}_f^i$  aligns with the face's

---

#### Algorithm 2 Analytical Vertex Gaussian Derivation

---

**Input:** Posed vertex  $\mathbf{v}_v^p \in \mathbb{R}^3$ , adjacent faces  $\mathcal{N}(j)$ , one-ring neighbors  $\mathcal{N}_1(j)$

**Hyperparameters:**  $\gamma = 0.5, \epsilon = 10^{-3}$

**Output:**  $\boldsymbol{\mu}_v^j \in \mathbb{R}^3, \mathbf{R}_v^j \in SO(3), \mathbf{s}_v^j \in \mathbb{R}^3$

```

1: // Position: anchor at vertex
2:  $\boldsymbol{\mu}_v^j \leftarrow \mathbf{v}_v^p$ 
3: // Orientation: area-weighted normal from adjacent faces
4:  $\mathbf{n}_v^j \leftarrow \frac{\sum_{f \in \mathcal{N}(j)} A_f \mathbf{n}_f}{\|\sum_{f \in \mathcal{N}(j)} A_f \mathbf{n}_f\|}$ 
5: // Construct stable orthonormal frame
6:  $\mathbf{r} \leftarrow \arg \min_{\mathbf{u} \in \{\mathbf{e}_x, \mathbf{e}_y, \mathbf{e}_z\}} |\mathbf{u}^\top \mathbf{n}_v^j|$ 
7:  $\mathbf{t}_1^j \leftarrow \frac{\mathbf{r} \times \mathbf{n}_v^j}{\|\mathbf{r} \times \mathbf{n}_v^j\|}$ 
8:  $\mathbf{t}_2^j \leftarrow \mathbf{n}_v^j \times \mathbf{t}_1^j$ 
9:  $\mathbf{R}_v^j \leftarrow [\mathbf{t}_1^j, \mathbf{t}_2^j, \mathbf{n}_v^j]$ 
10: // Scale: adapt to local mesh density
11:  $s_{v,x}^j \leftarrow \gamma \cdot \min_{\mathbf{v}_k \in \mathcal{N}_1(j)} \|\mathbf{v}_k^p - \mathbf{v}_v^p\|$ 
12:  $s_{v,y}^j \leftarrow s_{v,x}^j, s_{v,z}^j \leftarrow \epsilon$ 
13: return  $\boldsymbol{\mu}_v^j, \mathbf{R}_v^j, \mathbf{s}_v^j = (s_{v,x}^j, s_{v,y}^j, s_{v,z}^j)$ 

```

---

coordinate frame (tangents  $\mathbf{t}_1^i, \mathbf{t}_2^i$  and normal  $\mathbf{n}_f^i$ ), and the scale  $s_f^i$  is tied to the inradius  $r_i$  for uniform coverage.

### 8.2. Vertex Gaussian Derivation

Algorithm 2 derives Vertex Gaussian  $\mathcal{G}_v^j$  for each vertex  $\mathbf{v}_v^p \in \mathcal{V}_p$ . The position  $\boldsymbol{\mu}_v^j$  is anchored at the vertex, the rotation  $\mathbf{R}_v^j$  is computed from area-weighted adjacent face normals, and the scale  $s_v^j$  adapts to local mesh density via minimum edge length to one-ring neighbors.

## 9. Additional Results and Analysis

### 9.1. Computational Efficiency

Table A compares computational efficiency against IHuman on the male-3-casual subject (PeopleSnapshot dataset) using a single NVIDIA GeForce RTX 3090 GPU.

Our method achieves comparable training time ( $\sim 2$  minutes) and higher rendering speed (50 FPS vs. 44 FPS) while using 62.5% fewer Gaussians (82,658 vs. 220,416), which directly translates to faster rasterization due to reduced computational overhead. Since geometric attributes ( $\boldsymbol{\mu}, \mathbf{R}, \mathbf{s}$ ) are analytically derived rather than stored, the checkpoint size is reduced by 44.5% (32.36 MB vs. 58.26 MB), storing only appearance parameters (SH coefficients and shape encoder). The fixed Gaussian count ( $M$  Face +

Table A. Computational efficiency comparison on the male-3-casual subject from PeopleSnapshot dataset.

| Method      | # Gaussians | Train Time | Model Size | FPS |
|-------------|-------------|------------|------------|-----|
| IHuman      | 220,416     | ~2 min     | 58.26 MB   | 44  |
| <b>Ours</b> | 82,658      | ~2 min     | 32.36 MB   | 50  |

Table B. Robustness to pose noise. We inject Gaussian noise  $\mathcal{N}(0, \sigma)$  into SMPL pose parameters on PeopleSnapshot male-3-casual. Percentages indicate relative degradation from  $\sigma=0$ .

| Noise ( $\sigma$ ) | PSNR $\uparrow$ |                | Normal( $\times 10^{-3}$ ) $\downarrow$ |                |
|--------------------|-----------------|----------------|-----------------------------------------|----------------|
|                    | Ours            | IHuman         | Ours                                    | IHuman         |
| 0                  | 28.92           | 26.66          | 1.88                                    | 2.04           |
| 0.005              | 27.02 (-6.6%)   | 23.75 (-10.9%) | 2.01 (+6.9%)                            | 2.53 (+24.0%)  |
| 0.01               | 25.72 (-11.1%)  | 22.54 (-15.5%) | 2.47 (+31.4%)                           | 3.13 (+53.4%)  |
| 0.02               | 23.81 (-17.7%)  | 20.69 (-22.4%) | 3.88 (+106.4%)                          | 4.56 (+138.2%) |

$N$  Vertex Gaussians) preserves topological correspondence without adaptive densification.

## 9.2. Robustness to Pose Noise

To evaluate the robustness of our topology-aware binding under inaccurate SMPL fitting, we inject Gaussian noise  $\mathcal{N}(0, \sigma)$  into the pose parameters on the PeopleSnapshot male-3-casual subject and compare against IHuman. As shown in Table B, our method degrades more gracefully across all noise levels. For instance, at  $\sigma=0.01$ , our PSNR drops by 11.1% compared to 15.5% for IHuman, and our normal error increases by 31.4% versus 53.4%. This is because our analytically-derived Gaussians remain bound to the mesh surface and move coherently with the deformation, rather than drifting or floating as in methods with unconstrained Gaussian optimization.

## 9.3. Sensitivity to ER Weight

We ablate the equilateral regularization weight  $\lambda_t$  on the X-Avatar dataset. We follow IHuman’s default settings for  $\lambda_n$  and  $\lambda_m$ , and vary only  $\lambda_t$ . As shown in Table C,  $\lambda_t=0.01$  achieves the best trade-off across all metrics. Disabling the regularization ( $\lambda_t=0$ ) leads to noticeable degradation in both rendering quality and geometric accuracy, confirming that equilateral regularization is essential for maintaining stable Gaussian binding under mesh deformation. Increasing  $\lambda_t$  beyond 0.01 over-constrains the mesh, slightly reducing reconstruction fidelity.

## 9.4. Additional Qualitative Results

Figures 8-10 present extended qualitative comparisons on the PeopleSnapshot and X-Avatar datasets. These results demonstrate our method’s robustness on challenging out-of-distribution poses, validating the effectiveness of our topology-aware Gaussian representation for maintaining consistent appearance fidelity and geometric accuracy

Table C. Sensitivity analysis of equilateral regularization weight  $\lambda_t$  on the X-Avatar dataset.

| $\lambda_t$        | PSNR $\uparrow$ | SSIM $\uparrow$ | Normal $\downarrow$ |
|--------------------|-----------------|-----------------|---------------------|
| 0                  | 27.32           | 0.977           | 1.93                |
| 0.005              | 28.01           | 0.979           | 1.79                |
| <b>0.01 (Ours)</b> | <b>28.13</b>    | <b>0.981</b>    | <b>1.74</b>         |
| 0.02               | 27.98           | 0.975           | 1.75                |

under extreme pose variations. The analytically-derived Gaussian attributes ensure stable deformation across diverse body configurations.

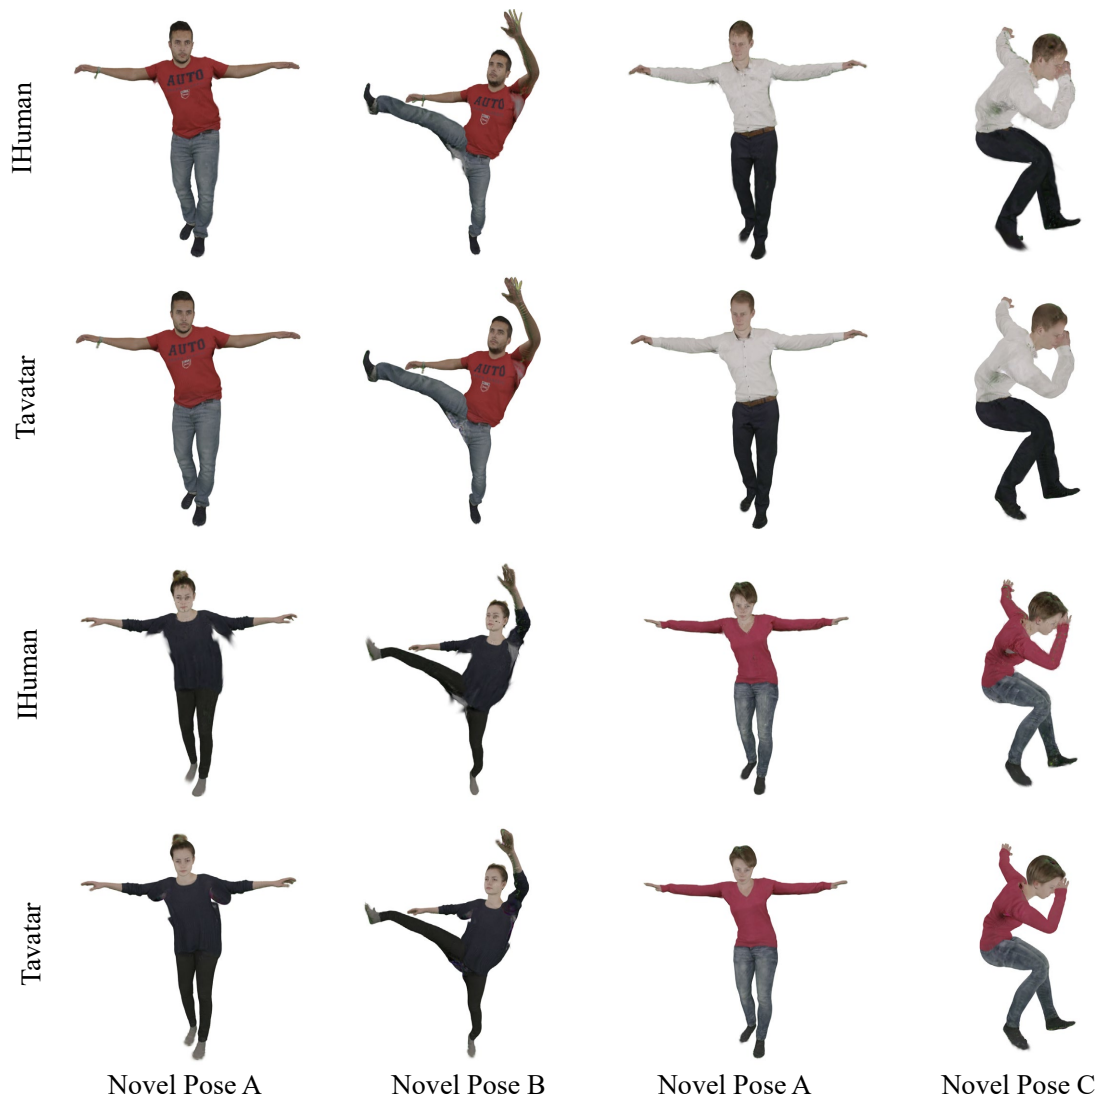

Figure 5. Qualitative comparison on novel out-of-distribution poses from the PeopleSnapshot dataset. *Please zoom in for detailed comparison.*

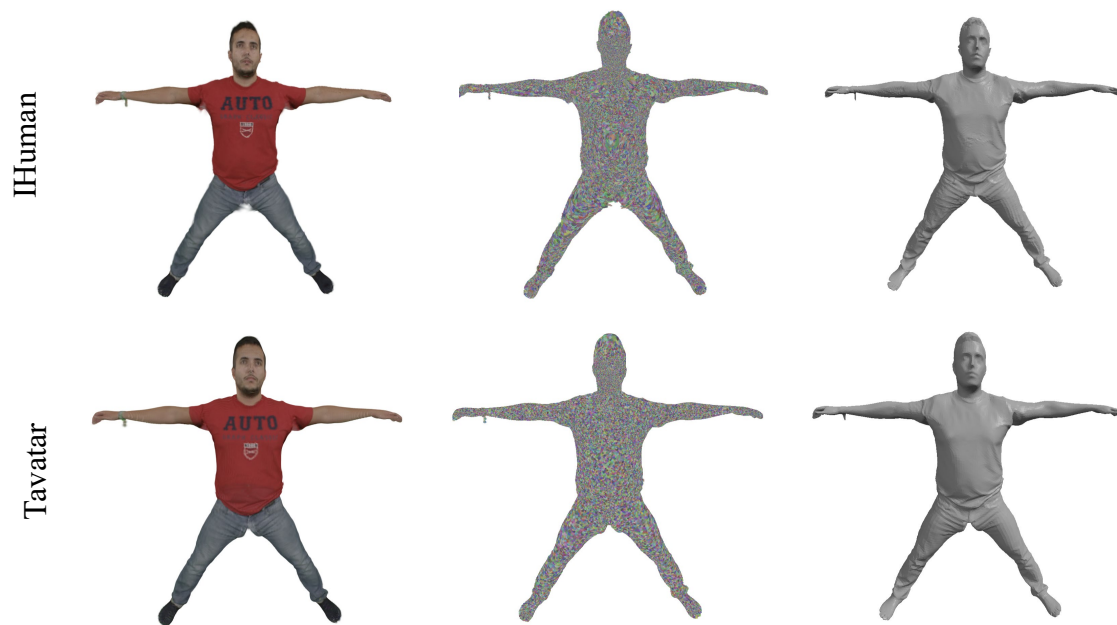

Figure 6. Qualitative comparison on male-3-casual subject performing Da-pose. *Please zoom in for detailed comparison.*

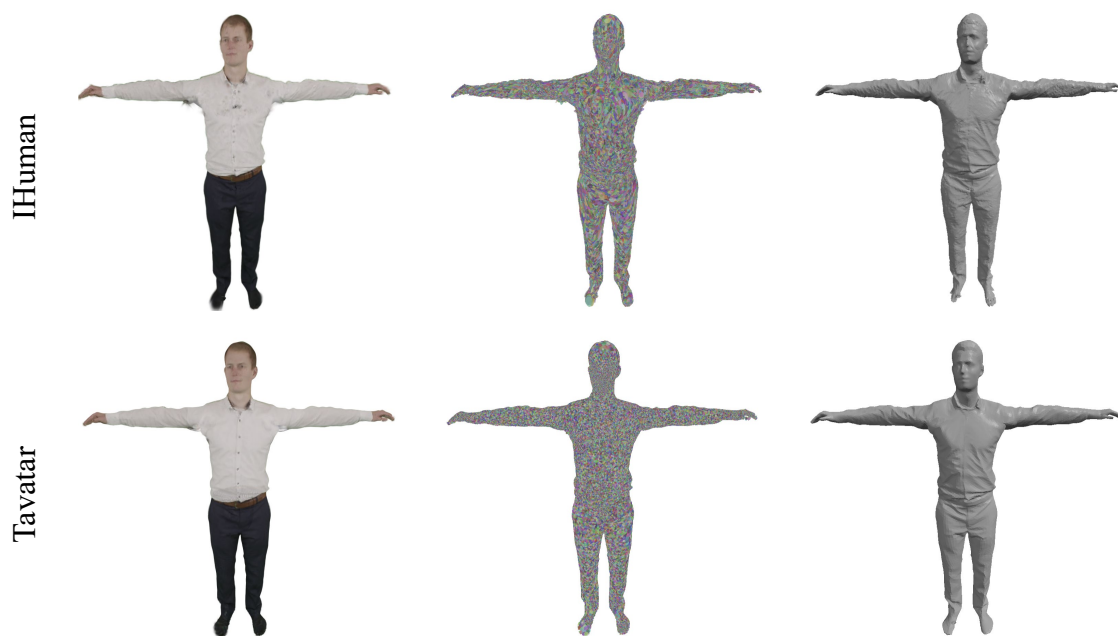

Figure 7. Qualitative comparison on male-4-casual subject in T-pose. *Please zoom in for detailed comparison.*

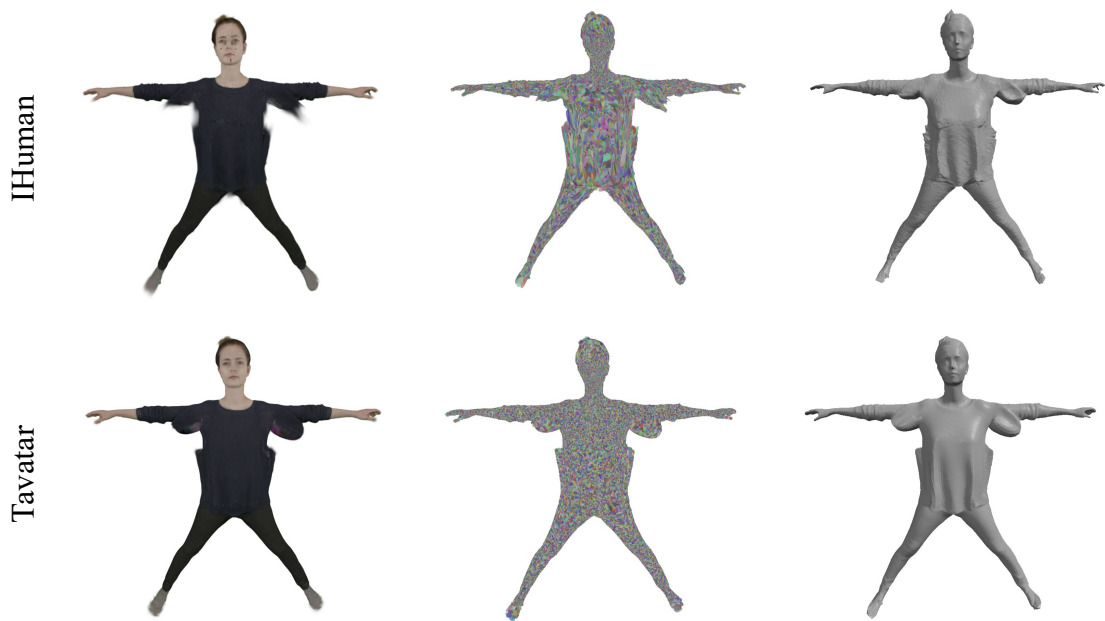

Figure 8. Qualitative comparison on female-3-casual subject performing Da-pose. *Please zoom in for detailed comparison.*

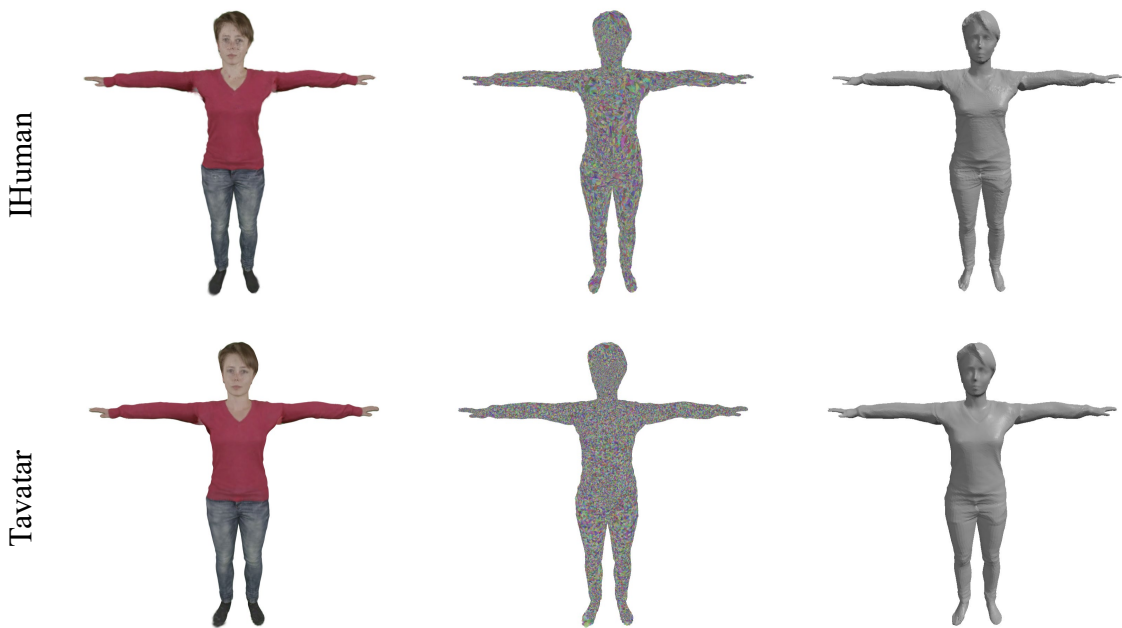

Figure 9. Qualitative comparison on female-4-casual subject in T-pose. *Please zoom in for detailed comparison.*

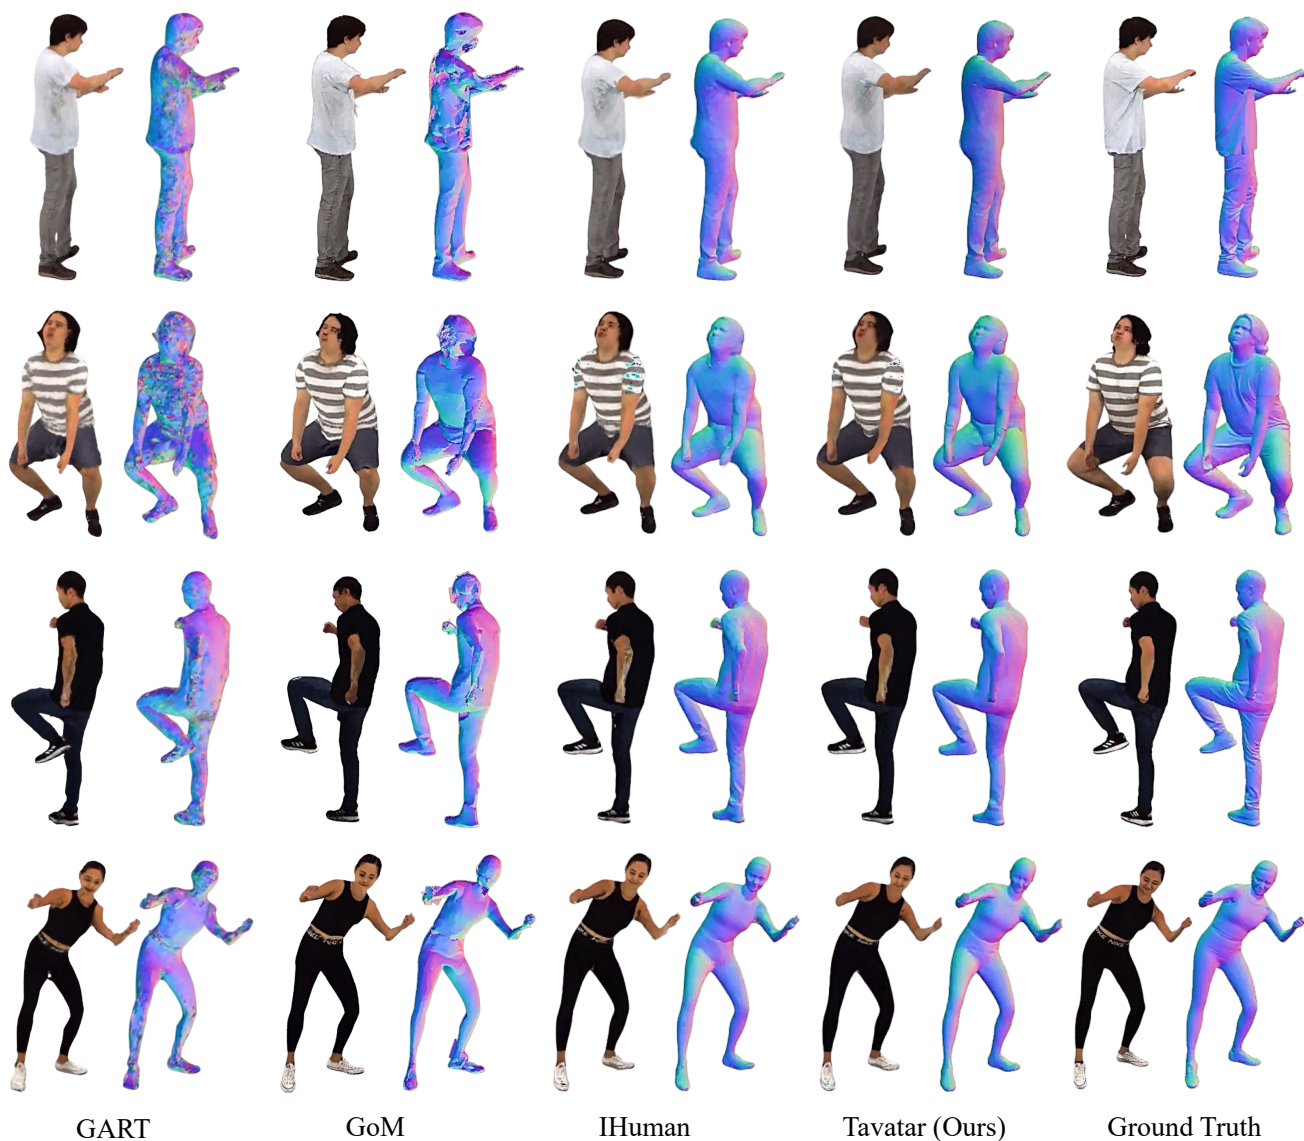

GART

GoM

IHuman

Tavatar (Ours)

Ground Truth

Figure 10. Additional qualitative comparison on the X-Avatar dataset. *Please zoom in for detailed comparison.*
